# Supplementary material for: CXXC5 (Retinoid-Inducible Nuclear Factor, RINF) is a Potential Therapeutic Target in High-Risk Human Acute Myeloid Leukemia
Source: PubMed Central journal article supplement (PMC3824541; doi:10.18632/oncotarget.1195), 2013-08-15
Supplement: oncotarget-04-1438-s001.pdf [file oncotarget-04-1438-s001.pdf]

**CXXC5 (Retinoid-Inducible Nuclear Factor, RINF) is a Potential Therapeutic Target in High-Risk Human Acute Myeloid Leukemia – Astori et al**

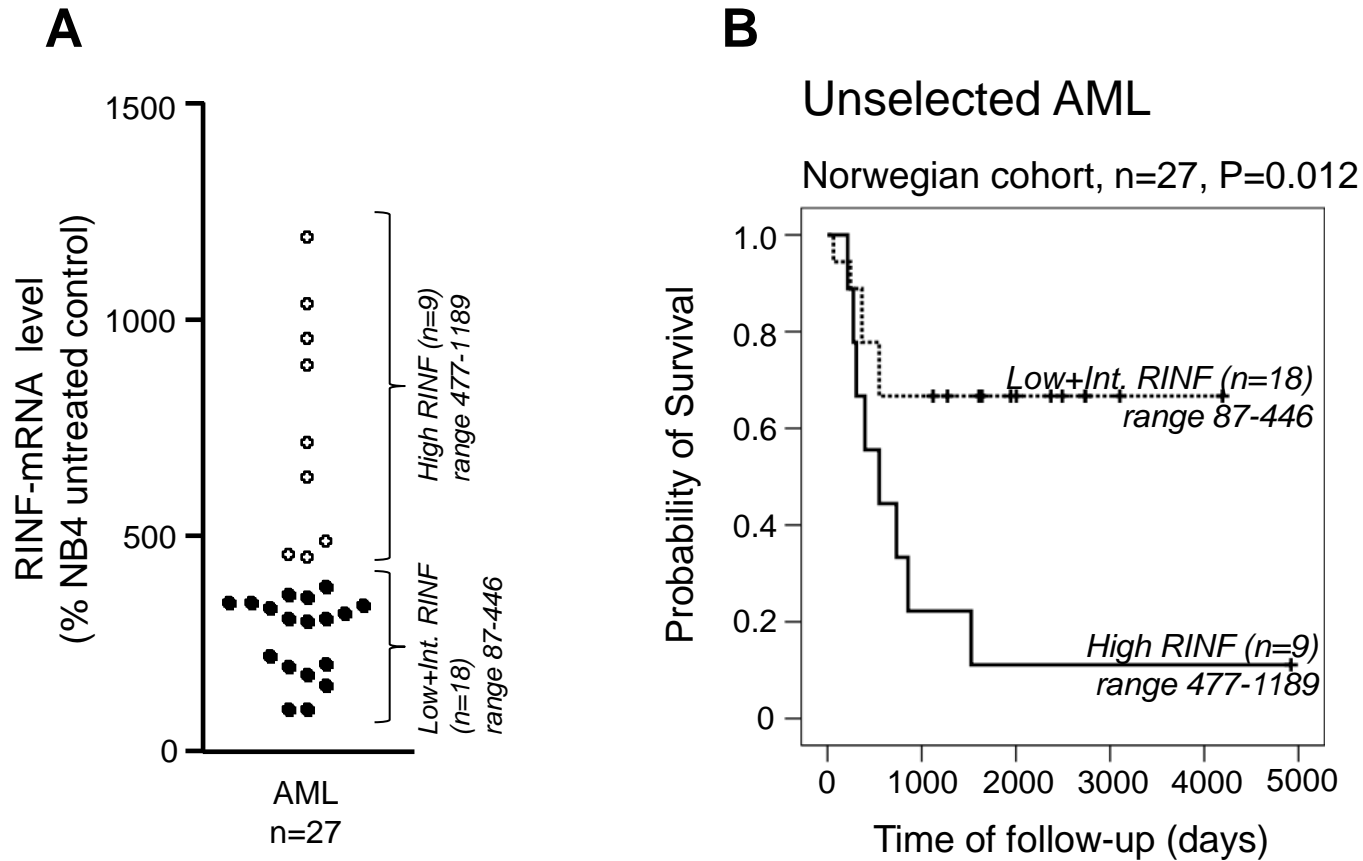

**Supplementary Figure 1: The association between RINF expression and overall survival; analysis of the Norwegian patients with newly diagnosed AML and receiving intensive chemotherapy.** Patients were classified as low, intermediate and high RINF expression. (A) The RINF expression level for the three groups. (B) Overall survival for the patients.

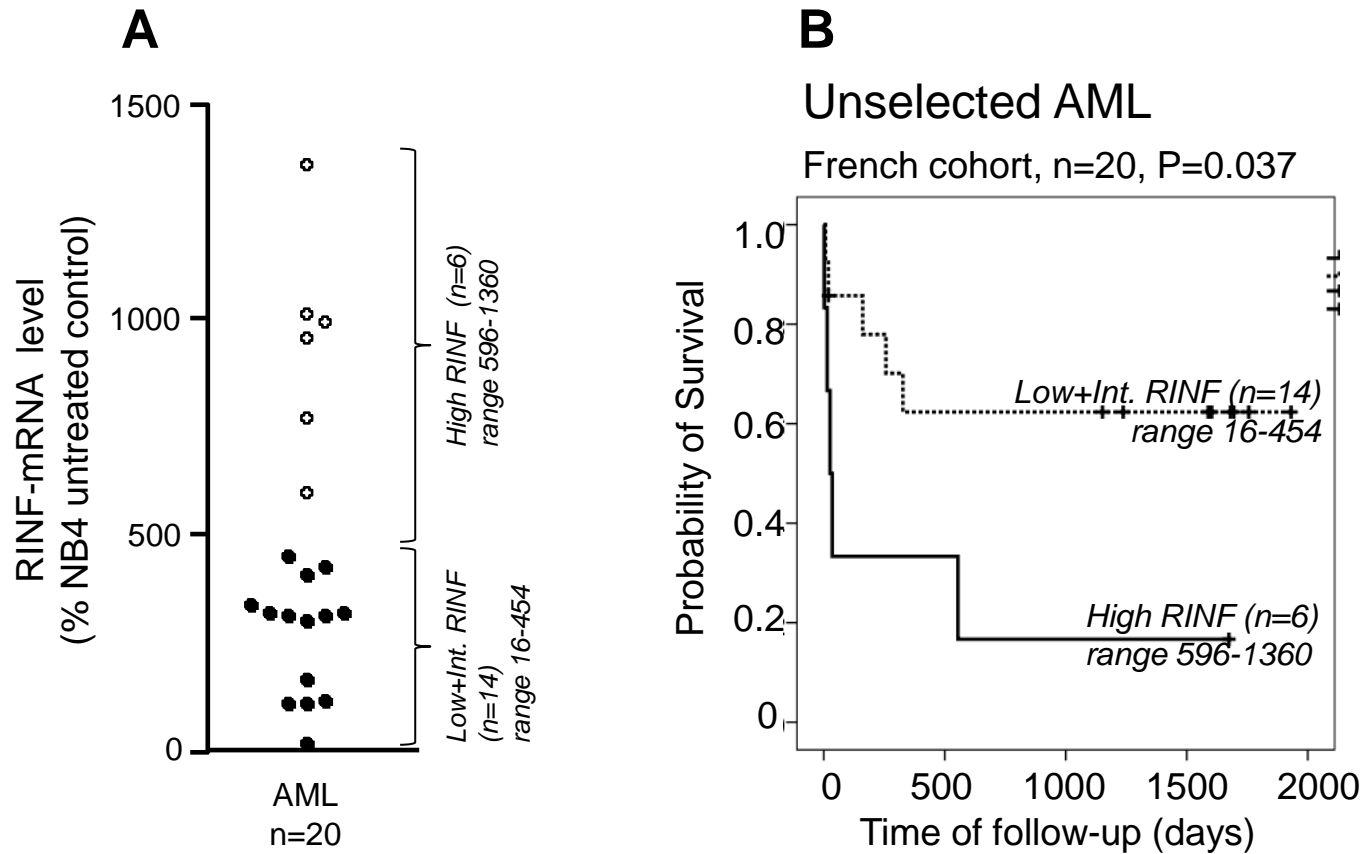

**Supplementary Figure 2: The association between RINF expression and overall survival; analysis of the French patients with newly diagnosed AML and receiving chemotherapy.** Patients were classified as low, intermediate and high RINF expression. (A) The RINF expression level for the three groups. (B) Overall survival for the patients.
