# Supplementary material for: CXXC5 (Retinoid-Inducible Nuclear Factor, RINF) is a Potential Therapeutic Target in High-Risk Human Acute Myeloid Leukemia
Source: PubMed Central journal article supplement (PMC3824541; doi:10.18632/oncotarget.1195), 2013-08-15
Supplement: oncotarget-04-1438-s002.pdf [file oncotarget-04-1438-s002.pdf]

## CXXC5 (Retinoid-Inducible Nuclear Factor, RINF) is a Potential Therapeutic Target in High-Risk Human Acute Myeloid Leukemia – Astori et al

### Supplementary Table 1

Clinical and biological characteristics of the subset of Norwegian patients with newly diagnosed AML who received intensive chemotherapy (n=27).

| Patient characteristics   | Range         | Mean / Median | Number of Patients |
|---------------------------|---------------|---------------|--------------------|
| Age at diagnostic (years) | 29-72         | 53 / 58       | 27                 |
| Gender                    | (male/female) |               | 17 / 10            |
| FAB classification        |               |               | Number of Patients |
| M0                        |               |               | 1                  |
| M1                        |               |               | 4                  |
| M2                        |               |               | 6                  |
| M3                        |               |               | 0                  |
| M4                        |               |               | 8                  |
| M4e                       |               |               | 1                  |
| M5                        |               |               | 7                  |
| Cytogenetics*             |               |               | Number of Patients |
| Normal                    |               |               | 15                 |
| Good                      |               |               | 4                  |
| Intermediate              |               |               | 1                  |
| Adverse                   |               |               | 6                  |
| Not determined            |               |               | 1                  |
| Gene Mutations            |               |               | Number of Patients |
| FLT3-ITD-                 |               |               | 16                 |
| FLT3-ITD+                 |               |               | 10                 |
| Not determined            |               |               | 1                  |
| NPM1-                     |               |               | 12                 |
| NPM1+                     |               |               | 13                 |
| Not determined            |               |               | 2                  |

\* Cytogenetic abnormalities were classified according to the MRC guidelines and were available for 100 % of the patients. FLT3-ITD and NPM1 analyses were available for 26 (96%) and 25 (92%) patients, respectively. FAB classification was available for 100 % of the patients

## Supplementary Table 2

Clinical and biological characteristics for the French AML patients receiving chemotherapy (n=20).

| <b>Patient characteristics</b> | <b>Range</b>  | <b>Mean / Median</b> | <b>Number of Patients</b> |
|--------------------------------|---------------|----------------------|---------------------------|
| Age at diagnostic (years)      | 21-87         | 67.3 / 72.5          | 20                        |
| Gender                         | (male/female) |                      | 13 / 7                    |

  

| <b>FAB classification</b> | <b>Number of Patients</b> |
|---------------------------|---------------------------|
| M0                        | 0                         |
| M1                        | 7                         |
| M2                        | 3                         |
| M3                        | 0                         |
| M4                        | 4                         |
| M4e                       | 1                         |
| M5                        | 5                         |

  

| <b>Cytogenetics*</b> | <b>Number of Patients</b> |
|----------------------|---------------------------|
| Normal               | 12                        |
| Good                 | 1                         |
| Intermediate         | 5                         |
| Adverse              | 2                         |

  

| <b>Gene Mutations</b> | <b>Number of Patients</b> |
|-----------------------|---------------------------|
| FLT3-ITD-             | 13                        |
| FLT3-ITD+             | 7                         |
| NPM1-                 | 12                        |
| NPM1+                 | 8                         |

\* Cytogenetic abnormalities, FAB classification, FLT3-ITD and NPM1 analyses were available for all the patients.
